# Supplementary material for: Temporal interpolation of land surface fluxes derived from remote sensing – results with an unmanned aerial system
Source: Copernicus journal article supplement (doi:10.5194/hess-24-3643-2020), 2020-07-22
Supplement: Supplementary file [file hess-24-3643-2020-supplement.pdf]

Supplement of Hydrol. Earth Syst. Sci., 24, 3643–3661, 2020  
<https://doi.org/10.5194/hess-24-3643-2020-supplement>  
© Author(s) 2020. This work is distributed under  
the Creative Commons Attribution 4.0 License.

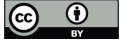

*Supplement of*

## **Temporal interpolation of land surface fluxes derived from remote sensing – results with an unmanned aerial system**

**Sheng Wang et al.**

*Correspondence to:* Sheng Wang ([shengwang12@gmail.com](mailto:shengwang12@gmail.com)) and Monica Garcia ([mgarc@env.dtu.dk](mailto:mgarc@env.dtu.dk))

The copyright of individual parts of the supplement might differ from the CC BY 4.0 License.

## List of abbreviations for model variables and parameters

### Latin alphabet

|                   |                                                                                                                 |
|-------------------|-----------------------------------------------------------------------------------------------------------------|
| A                 | Surface albedo (-)                                                                                              |
| b                 | the slope of the retention curve for the force-restore thermal coefficient (-)                                  |
| $C_d$             | Diurnal periodicity ( $\text{h}^{-1}$ )                                                                         |
| $C_p$             | Specific heat capacity of air ( $\text{J}\cdot\text{kg}^{-1}\cdot\text{K}^{-1}$ )                               |
| $C_{\text{sat}}$  | Force-restore thermal coefficient for saturated soil ( $\text{K}\cdot\text{m}^2\cdot\text{J}^{-1}$ )            |
| $C_T$             | Force-restore thermal coefficient for the surface heat transfer ( $\text{K}\cdot\text{m}^2\cdot\text{J}^{-1}$ ) |
| $C_{\text{veg}}$  | Force-restore thermal coefficient for vegetation ( $\text{K}\cdot\text{m}^2\cdot\text{J}^{-1}$ )                |
| CWS               | Canopy Water Storage (m)                                                                                        |
| $CWS_{\text{in}}$ | Initial canopy water storage (m)                                                                                |
| d                 | Zero displacement height (m)                                                                                    |
| $D_0$             | Empirical coefficient for VPD constraint (Pa)                                                                   |
| $f_g$             | Green canopy fraction (-)                                                                                       |
| $f_M$             | Plant moisture constraint (-)                                                                                   |
| $f_{T_a}$         | Plant temperature constraint (-)                                                                                |
| $f_{SM}$          | SM constraint (-)                                                                                               |
| $f_{VPD}$         | Vapor pressure deficit constraint (-)                                                                           |
| $f_{APAR}$        | Fraction of PAR absorbed by green vegetation cover (-)                                                          |
| $f_{IPAR}$        | Fraction of PAR intercepted by total vegetation cover (-)                                                       |
| G                 | Ground heat flux ( $\text{W}\cdot\text{m}^{-2}$ )                                                               |
| g                 | Gravitational acceleration ( $\text{m}\cdot\text{s}^{-2}$ )                                                     |
| GPP               | Gross Primary Productivity ( $\mu\text{mol}\cdot\text{C}\cdot\text{m}^{-2}\cdot\text{s}^{-1}$ )                 |
| H                 | Sensible heat flux ( $\text{W}\cdot\text{m}^{-2}$ )                                                             |
| $h_c$             | Canopy height (m)                                                                                               |
| k                 | von Karman constant (0.4)                                                                                       |
| kB-1              | Parameter to account for difference of aerodynamic and radiometric temperatures (-)                             |
| $K_s$             | Saturated hydraulic conductivity ( $\text{m}\cdot\text{s}^{-1}$ )                                               |
| LAI               | Leaf area index ( $\text{m}^2\cdot\text{m}^{-2}$ )                                                              |
| LE                | Latent heat flux ( $\text{W}\cdot\text{m}^{-2}$ )                                                               |
| $LW_{\text{in}}$  | Incoming longwave radiation ( $\text{W}\cdot\text{m}^{-2}$ )                                                    |
| $LW_{\text{out}}$ | Outgoing longwave radiation ( $\text{W}\cdot\text{m}^{-2}$ )                                                    |
| n                 | Fitting parameter in the Mualem model depending on the pore size (-)                                            |
| NDVI              | Normalized Difference Vegetation Index (-)                                                                      |
| P                 | Precipitation ( $\text{mm}\cdot\text{h}^{-1}$ )                                                                 |
| PAR               | Photosynthetically active radiation ( $\mu\text{mol}\cdot\text{m}^{-2}\cdot\text{s}^{-1}$ )                     |
| $PAR_c$           | PAR intercepted by the canopy ( $\mu\text{mol}\cdot\text{m}^{-2}\cdot\text{s}^{-1}$ )                           |
| $PAR_s$           | PAR for the soil ( $\mu\text{mol}\cdot\text{m}^{-2}\cdot\text{s}^{-1}$ )                                        |
| $P_e$             | Effective precipitation rate ( $\text{mm}\cdot\text{h}^{-1}$ )                                                  |
| $P_s$             | Air pressure (Pa)                                                                                               |
| $Q_d$             | Soil water drainage ( $\text{m}\cdot\text{s}^{-1}$ )                                                            |
| $Q_s$             | Surface runoff ( $\text{m}\cdot\text{s}^{-1}$ )                                                                 |
| $Q_{\text{inf}}$  | Infiltration ( $\text{m}\cdot\text{s}^{-1}$ )                                                                   |
| $r_a$             | Aerodynamic resistance for heat transfer ( $\text{s}\cdot\text{m}^{-1}$ )                                       |
| $r_{aN}$          | Aerodynamic resistance for heat transfer under neutral conditions ( $\text{s}\cdot\text{m}^{-1}$ )              |
| RH                | Relative humidity (%)                                                                                           |
| $R_{iB}$          | Bulk Richardson number (-)                                                                                      |

|                    |                                                               |
|--------------------|---------------------------------------------------------------|
| Rn                 | Net radiation ( $\text{W}\cdot\text{m}^{-2}$ )                |
| Rnc                | Net radiation for the canopy ( $\text{W}\cdot\text{m}^{-2}$ ) |
| Rns                | Net radiation for the soil ( $\text{W}\cdot\text{m}^{-2}$ )   |
| SAVI               | Soil adjusted vegetation index (-)                            |
| SR                 | Simple ratio vegetation index (-)                             |
| SW <sub>in</sub>   | Incoming shortwave radiation ( $\text{W}\cdot\text{m}^{-2}$ ) |
| SW <sub>out</sub>  | Outgoing shortwave radiation ( $\text{W}\cdot\text{m}^{-2}$ ) |
| SWS                | Actual soil water storage (m)                                 |
| SWS <sub>in</sub>  | Initial soil water storage (m)                                |
| SWS <sub>max</sub> | Maximum soil water storage (m)                                |
| T <sub>a</sub>     | Air temperature ( $^{\circ}\text{C}$ )                        |
| T <sub>d</sub>     | Deep soil temperature ( $^{\circ}\text{C}$ )                  |
| T <sub>d0</sub>    | Initial deep soil temperature ( $^{\circ}\text{C}$ )          |
| T <sub>o</sub>     | Optimum plant growth temperature ( $^{\circ}\text{C}$ )       |
| T <sub>s</sub>     | Surface temperature ( $^{\circ}\text{C}$ )                    |
| T <sub>s0</sub>    | Initial surface temperature ( $^{\circ}\text{C}$ )            |
| u                  | Wind speed ( $\text{m}\cdot\text{s}^{-1}$ )                   |
| VPD                | Vapor pressure deficit (Pa)                                   |
| z                  | Velocity reference height (m)                                 |
| Z <sub>oh</sub>    | Aerodynamic roughness length for the heat transfer (m)        |
| Z <sub>om</sub>    | Aerodynamic roughness length for momentum (m)                 |

### Greek alphabet

|                            |                                                                                                        |
|----------------------------|--------------------------------------------------------------------------------------------------------|
| $\alpha$                   | PT coefficient (-)                                                                                     |
| $\gamma$                   | Psychrometric constant ( $0.066 \text{ kPa}\cdot^{\circ}\text{C}^{-1}$ )                               |
| $\Delta$                   | Slope of saturation-to-vapor pressure curve ( $\text{kPa}\cdot^{\circ}\text{C}^{-1}$ )                 |
| $\varepsilon$              | Surface emissivity (-)                                                                                 |
| $\varepsilon_{\text{max}}$ | Maximum light use efficiency ( $\mu\text{mol}\cdot\text{C}\cdot\text{m}^{-2}\cdot\text{MJ}^{-1}$ )     |
| $\theta$                   | Volumetric soil moisture ( $\text{m}^3\cdot\text{m}^{-3}$ )                                            |
| $\theta_s$                 | Saturated soil moisture ( $\text{m}^3\cdot\text{m}^{-3}$ )                                             |
| $\theta_r$                 | Residual soil moisture ( $\text{m}^3\cdot\text{m}^{-3}$ )                                              |
| $\lambda E_i$              | Evaporation of intercepted water ( $\text{W}\cdot\text{m}^{-2}$ )                                      |
| $\lambda E_c$              | Transpiration ( $\text{W}\cdot\text{m}^{-2}$ )                                                         |
| $\lambda E_s$              | Soil evaporation ( $\text{W}\cdot\text{m}^{-2}$ )                                                      |
| $\rho$                     | Air density ( $\text{kg}\cdot\text{m}^{-3}$ )                                                          |
| $\sigma$                   | Stefan-Boltzmann constant ( $5.670367 \times 10^{-8} \text{ kg}\cdot\text{s}^{-3}\cdot\text{K}^{-4}$ ) |
| $\Psi_h$                   | Stability correction factor for sensible heat flux (-)                                                 |
| $\Psi_m$                   | Stability correction factor for momentum (-)                                                           |

**Table S1.** Environmental constraints for the joint ET and GPP model (Wang et al., 2018). The extinction coefficients for PAR ( $k_{PAR}$ ) and for net radiation ( $k_{Rn}$ ) were equal to 0.5 and 0.6, respectively (Fisher et al., 2008; Impens and Lemeur, 1969; Ross, 1975). RH is the relative humidity.

| Parameter  | Description                                           | Equation                                                                               | Reference              |
|------------|-------------------------------------------------------|----------------------------------------------------------------------------------------|------------------------|
| $f_g$      | Green canopy fraction                                 | $f_g = f_{APAR}/f_{IPAR}$                                                              | Fisher et al. (2008)   |
| $f_M$      | Plant moisture constraint                             | $f_M = f_{APAR}/\max(f_{APAR})$                                                        | Fisher et al. (2008)   |
| $f_{Ta}$   | Plant temperature constraint                          | $f_{Ta} = 1.1814 \cdot [1 + e^{0.3(-T_o-10+T_a)}]^{-1} [1 + e^{0.2(T_o-10-T_a)}]^{-1}$ | Potter et al. (1993)   |
| $f_{SM}$   | SM constraint                                         | $f_{SM} = \theta_e$                                                                    | Fisher et al. (2008)   |
| $f_{VPD}$  | Vapor pressure deficit constraint                     | $f_{VPD} = 1/(1 + VPD/D0)$                                                             | Lohammar et al. (1980) |
| $f_{APAR}$ | Fraction of PAR absorbed by green vegetation cover    | $f_{APAR} = 1.4 \text{ SAVI} - 0.05$                                                   | Fisher et al. (2008)   |
| $f_{IPAR}$ | Fraction of PAR intercepted by total vegetation cover | $f_{IPAR} = 1.0 \text{ NDVI} - 0.05$                                                   | Fisher et al. (2008)   |

**Table S2.** Information of model inputs to run SVEN at half hour time steps

| Input     | Description                            | Unit              |
|-----------|----------------------------------------|-------------------|
| $SW_{in}$ | Incoming shortwave radiation           | $W \cdot m^{-2}$  |
| $LW_{in}$ | Incoming longwave radiation            | $W \cdot m^{-2}$  |
| $T_a$     | Air temperature                        | $^{\circ}C$       |
| RH        | Relative air humidity                  | %                 |
| u         | Wind speed                             | $m \cdot s^{-1}$  |
| $P_s$     | Air pressure                           | Pa                |
| P         | Precipitation                          | $mm \cdot h^{-1}$ |
| $h_c$     | Canopy height                          | m                 |
| NDVI      | Normalized Difference Vegetation Index | \                 |

**Table S3.** Information on model initial conditions

| Initial conditions | Description                   | Unit | Initial value |
|--------------------|-------------------------------|------|---------------|
| $CWS_{in}$         | Initial canopy water storage  | m    | 0.00          |
| $SWS_{in}$         | Initial soil water storage    | m    | 0.50          |
| $T_{s0}$           | Initial surface temperature   | °C   | $T_a$         |
| $T_{d0}$           | Initial deep soil temperature | °C   | $T_a$         |

**Table S4.** Information on model outputs

| Output        | Description                      | Unit                                  |
|---------------|----------------------------------|---------------------------------------|
| $T_s$         | Surface temperature              | °C                                    |
| $T_d$         | Deep soil temperature            | °C                                    |
| $LW_{out}$    | Outgoing longwave radiation      | $W \cdot m^{-2}$                      |
| $SW_{out}$    | Outgoing shortwave radiation     | $W \cdot m^{-2}$                      |
| $R_n$         | Net radiation                    | $W \cdot m^{-2}$                      |
| $G$           | Ground heat flux                 | $W \cdot m^{-2}$                      |
| $LE$          | Latent heat flux                 | $W \cdot m^{-2}$                      |
| $\lambda E_i$ | Evaporation of intercepted water | $W \cdot m^{-2}$                      |
| $\lambda E_c$ | Transpiration                    | $W \cdot m^{-2}$                      |
| $\lambda E_s$ | Soil evaporation                 | $W \cdot m^{-2}$                      |
| $H$           | Sensible heat flux               | $W \cdot m^{-2}$                      |
| $GPP$         | Gross Primary Productivity       | $g \cdot C \cdot m^{-2} \cdot d^{-1}$ |
| $CWS$         | Canopy Water Storage             | m                                     |
| $\theta$      | Volumetric SM                    | $m^3 \cdot m^{-3}$                    |
| $Q_s$         | Surface runoff                   | $m \cdot s^{-1}$                      |
| $Q_{per}$     | Percolation                      | $m \cdot s^{-1}$                      |

**Table S5.** Parameter values of the Mualem model for different soil texture classes (Carsel and Parrish, 1988).  $\theta_r$  is the residual soil moisture ( $\text{m}^3 \cdot \text{m}^{-3}$ ).  $\theta_s$  is the saturated soil moisture ( $\text{m}^3 \cdot \text{m}^{-3}$ ).  $n$  is the fitting parameter of the Mualem model.  $K_s$  is the infiltration rate for the saturated soil ( $\text{mm} \cdot \text{h}^{-1}$ ). Values in the brackets are standard deviations.

| Texture class   | $\theta_r$    | $\theta_s$  | $n$         | $K_s$          |
|-----------------|---------------|-------------|-------------|----------------|
| Sand            | 0.045 (0.010) | 0.43 (0.06) | 2.68 (0.29) | 297.00 (156.0) |
| Loamy sand      | 0.057 (0.015) | 0.41 (0.09) | 2.28 (0.27) | 145.90 (113.6) |
| Sandy loam      | 0.065 (0.017) | 0.41 (0.09) | 1.89 (0.17) | 44.20 (56.3)   |
| Loam            | 0.078 (0.013) | 0.43 (0.10) | 1.56 (0.11) | 10.40 (18.2)   |
| Silt            | 0.034 (0.010) | 0.46 (0.11) | 1.37 (0.05) | 2.50 (3.3)     |
| Silt loam       | 0.067 (0.015) | 0.45 (0.08) | 1.41 (0.12) | 4.50 (12.3)    |
| Sandy clay loam | 0.100 (0.006) | 0.39 (0.07) | 1.48 (0.13) | 13.10 (27.4)   |
| Clay loam       | 0.095 (0.010) | 0.41 (0.09) | 1.31 (0.09) | 2.60 (7.0)     |
| Silty clay loam | 0.089 (0.009) | 0.43 (0.07) | 1.23 (0.06) | 0.70 (1.9)     |
| Sandy clay      | 0.100 (0.013) | 0.38 (0.05) | 1.23 (0.10) | 1.20 (2.8)     |
| Silty clay      | 0.070 (0.023) | 0.36 (0.07) | 1.09 (0.06) | 0.20 (1.1)     |
| Clay            | 0.068 (0.034) | 0.38 (0.09) | 1.09 (0.09) | 2.00 (4.2)     |

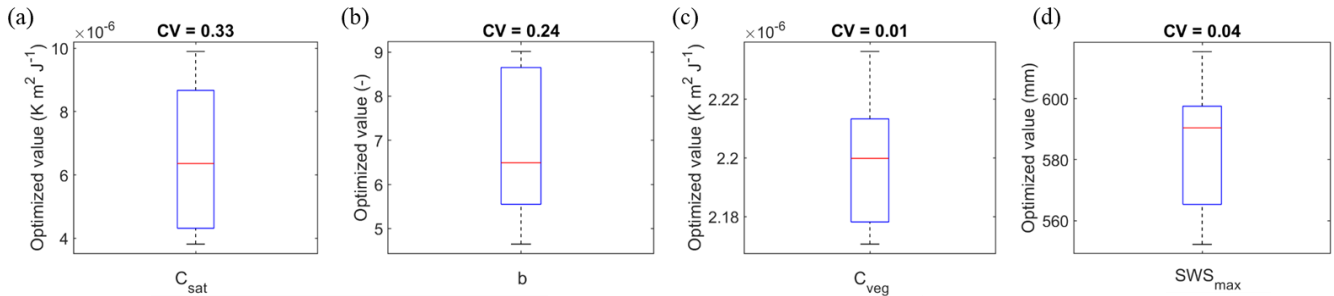

**Figure S1.** Boxplots of the best ten parameter values from the Pareto front analysis. CV refers the coefficient of variation (mean/standard deviations).

## Reference

- Carsel, R. F. and Parrish, R. S.: Developing joint probability distributions of soil water retention characteristics, *Water Resour. Res.*, 24(5), 755–769, doi:10.1029/WR024i005p00755, 1988.
- Fisher, J. B., Tu, K. P. and Baldocchi, D. D.: Global estimates of the land-atmosphere water flux based on monthly AVHRR and ISLSCP-II data, validated at 16 FLUXNET sites, *Remote Sens. Environ.*, 112(3), 901–919, doi:10.1016/j.rse.2007.06.025, 2008.
- Huete, A. R.: A soil-adjusted vegetation index (SAVI), *Remote Sens. Environ.*, 25(3), 295–309, doi:10.1016/0034-4257(88)90106-X, 1988.
- Impens, I. and Lemeur, R.: Extinction of net radiation in different crop canopies, *Arch. für Meteorol. Geophys. und Bioklimatologie Ser. B*, 17(4), 403–412, doi:10.1007/BF02243377, 1969.
- LEUNING, R.: A critical appraisal of a combined stomatal-photosynthesis model for C3 plants, *Plant. Cell Environ.*, 18(4), 339–355, doi:10.1111/j.1365-3040.1995.tb00370.x, 1995.
- Lohammar, T., Larsson, S., Linder, S. and Falk, S. O.: FAST: Simulation Models of Gaseous Exchange in Scots Pine, *Ecol. Bull.*, (32), 505–523, doi:10.2307/20112831, 1980.
- Potter, C. S., Randerson, J. T., Field, C. B., Matson, P. A., Vitousek, P. M., Mooney, H. A. and Klooster, S. A.: Terrestrial ecosystem production: A process model based on global satellite and surface data, *Global Biogeochem. Cycles*, 7(4), 811–841, doi:10.1029/93GB02725, 1993.
- Ross, J.: Radiative transfer in plant communities, *Veg. Atmos.*, 13–55, 1975.
- Ruimy, A., Kergoat, L. and Bondeau, A.: Comparing global models of terrestrial net primary productivity (NPP): Analysis of differences in light absorption and light-use efficiency, *Glob. Chang. Biol.*, 5(SUPPL. 1), 56–64, doi:10.1046/j.1365-2486.1999.00007.x, 1999.
